# Supplementary material for: Biofunctionalized Zinc Oxide Field Effect Transistors for Selective Sensing of Riboflavin with Current Modulation
Source: PubMed Central journal article supplement (PMC3231651; doi:10.3390/s110706645), 2011-06-27
Supplement: sensors-11-06645-s001.pdf [file sensors-11-06645-s001.pdf]

## Supplementary Information

**Figure S1.** Schematic of silane linker and aptamer attachment on a ZnO surface. (a) Surface condition and silane oligomer structure, (b) covalent attachment of silane oligomer to ZnO surface, (c) covalent attachment of aptamer to silane linker and complete functionalized structure.

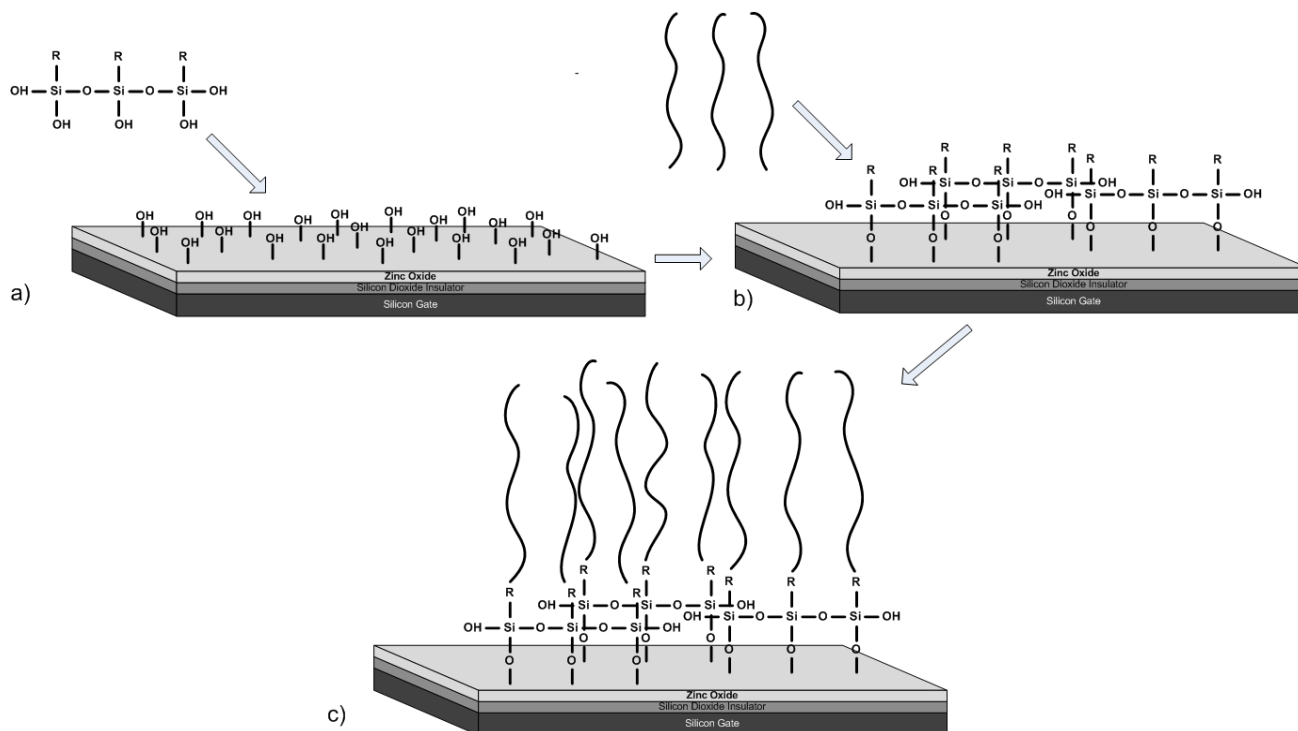

**Figure S2.** X-ray photoelectron spectroscopy data confirming attachment of silane linkage and aptamers to the ZnO semiconductor. ZnO FET shows on Nitrogen, ZnO FET w/Silane shows an increase in Si 2s and 2p, and AptaFET shows the presence of 0.64% Nitrogen associated with the large amount of Nitrogen present in DNA.

| Sample           | Si 2s  | Si 2p  | N 1s  | C 1s  | O 1s   |
|------------------|--------|--------|-------|-------|--------|
| ZnO FET          | 17.15% | 16.42% | -     | 7.55% | 30.83% |
| ZnO FET w/Silane | 17.44% | 17.34% | -     | 7.81% | 31.44% |
| AptaFET          | 17.48% | 17.10% | 0.64% | 6.98% | 31.33% |
